# Supplementary material for: Unveiling the role of NiFeM hydroxide (M = Pt, Ru, Ir, Rh) cocatalysts for robust H2 production in photocatalytic water splitting
Source: Royal Society of Chemistry journal article supplement (doi:10.1039/d4cc06199c), 2025-01-01
Supplement: d4cc06199c1.pdf [file d4cc06199c1.pdf]

## Supporting information

### **Unveiling the role of NiFeM hydroxides (M=Pt, Ru, Ir, Rh) cocatalysts for robust H<sub>2</sub> production in photocatalytic water splitting†**

Mengmeng Shao,<sup>\*ab</sup> Wei Shi,<sup>c</sup> Junhui Jiang,<sup>d</sup> Shihua Tan,<sup>e</sup> Xuehan Wang,<sup>b</sup> Jiawei Fei,<sup>b</sup> Jinhua Li<sup>b</sup>  
and Zhangjing Zhang<sup>\*a</sup>

<sup>a</sup> Fujian Provincial Key Laboratory of Polymer Materials, College of Materials Science and Engineering, Fujian Normal University, Fuzhou 350007, China

Email: shaommzjut@163.com; zzhang@fjnu.edu.cn

<sup>b</sup> Zhejiang Huayuan Pigment Co., Ltd, Huzhou 313220, China

<sup>c</sup> Hangzhou Chaoteng Energy Technology Co., Ltd, Hangzhou 310051, China

<sup>d</sup> Taizhou Pollution Prevention and Control Engineering Center Co., Ltd, Taizhou 318000, China

<sup>e</sup> Hunan Province Key Laboratory of Materials Surface or Interface Science and Technology, Central South University of Forestry and Technology, Changsha 410004, China

This file includes Fig. S1-S15, and Table S1-S5.

## 1. Experimental section

### 1.1. Chemicals and materials

Nickel nitrate hexahydrate ( $\text{Ni}(\text{NO}_3)_2 \cdot 6\text{H}_2\text{O}$ ), platinum tetrachloride ( $\text{PtCl}_4$ ), triethanolamine ( $\text{C}_6\text{H}_{15}\text{NO}_3$ , TEOA), ethanol were purchased from Shanghai Aladdin Biochemical Technology Co., Ltd. Iron nitrate nonahydrate ( $\text{Fe}(\text{NO}_3)_3 \cdot 9\text{H}_2\text{O}$ ), ruthenium trichloride trihydrate ( $\text{RuCl}_3 \cdot 3\text{H}_2\text{O}$ ), rhodium trichloride trihydrate ( $\text{RhCl}_3 \cdot 3\text{H}_2\text{O}$ ), and urea ( $\text{CO}(\text{NH}_2)_2$ ) were purchased from Shanghai Macklin Biochemical Co., Ltd. Iridium trichloride trihydrate ( $\text{IrCl}_3 \cdot 3\text{H}_2\text{O}$ ) was obtained from Shanghai Bide Pharmatech Ltd. Sodium sulfate ( $\text{Na}_2\text{SO}_4$ ), sodium sulfite ( $\text{Na}_2\text{SO}_3$ ), sodium sulfide nonahydrate ( $\text{Na}_2\text{S} \cdot 9\text{H}_2\text{O}$ ), and potassium hydroxide (KOH) were purchased from Tianjin Damao Chemical Reagent Factory. Nafion solution (5 wt%) was acquired from Shanghai Hesun Electrical Co., Ltd. The above chemicals were of analytical grade and utilized as received. Indium tin oxide (ITO) glass substrates were provided by Nanbo Glass Shenzhen, China. The highly purified water was used in our experiments and produced by a ultrapure water system (ULUPURE, UPR-II-TN).

### 1.2. Fabrication of Pt group metals doped NiFe-LDH cocatalysts

The NiFe-LDH doped with Pt group metals was fabricated by traditional hydrothermal method. Specifically, for NiFePt-LDH synthesis, 1.5 mmol  $\text{Ni}(\text{NO}_3)_2 \cdot 6\text{H}_2\text{O}$ , 0.5 mmol  $\text{Fe}(\text{NO}_3)_3 \cdot 9\text{H}_2\text{O}$ , 30 mmol urea, and 0.02 mmol  $\text{PtCl}_4$  were dissolved in 40 mL water. Afterwards, the above solution was transferred to the Teflon-lined autoclave and heated to 120 °C for 12 h. The reaction was then cooled down naturally and the solid product was washed several times with water and

ethanol, which was finally dried at 60 °C for 12 h to obtain the NiFe-LDH with Pt dopant, i.e. NiFePt-LDH. For the synthesis of other noble metal-doped NiFe-LDH, the same process was carried out but replacing PtCl<sub>4</sub> with RuCl<sub>3</sub>·3H<sub>2</sub>O, IrCl<sub>3</sub>·3H<sub>2</sub>O, or RhCl<sub>3</sub>·3H<sub>2</sub>O. Herein, the as-prepared NiFeM-LDH (M=Pt, Ru, Ir, Rh) was denoted as NiFeM for simplicity. And the pristine NiFe-LDH was also synthesized through the same approach and denoted as NiFe.

### **1.3. Fabrication of NiFeM-LDH loaded g-C<sub>3</sub>N<sub>4</sub>**

The NiFeM-LDH loaded g-C<sub>3</sub>N<sub>4</sub> was prepared by the ultrasound-assisted self-assembly process. Firstly, the pristine g-C<sub>3</sub>N<sub>4</sub> was synthesized by calcining urea at 550 °C for 4 h. Then the received g-C<sub>3</sub>N<sub>4</sub> (50 mg) and NiFeM-LDH (10 mg) were dispersed separately in ethanol and sonicated for 30 min. Subsequently, the two suspensions were mixed and further sonicated for another 60 min to acquire NiFeM-LDH loaded g-C<sub>3</sub>N<sub>4</sub> after filtration, washing and drying. Herein, the NiFeM-LDH loaded g-C<sub>3</sub>N<sub>4</sub> was denoted as NiFeM/CN, and the pristine NiFe-LDH modified g-C<sub>3</sub>N<sub>4</sub> was also prepared and recorded as NiFe/CN.

### **1.4. Material characterizations and photoelectrochemical properties**

The as-prepared samples were characterized by X-ray diffractometer (XRD), scanning electron microscopy (SEM), energy dispersive spectrometer (EDS), N<sub>2</sub> adsorption-desorption isotherm, X-ray photoelectron spectroscopy (XPS), ultraviolet photoelectron spectroscopy (UPS), UV-vis diffuse reflectance spectra (UV-vis DRS), and photoluminescence spectroscopy (PL). The XRD patterns were acquired on a Bruker D8 Advance diffractometer with Cu K $\alpha$  radiation. SEM images and EDS

results were obtained on a FEI Verios G4 UC microscopy. The N<sub>2</sub> adsorption-desorption isotherms were performed by using Quantachrome Autosorb-iQ-MP instrument. XPS and UPS spectra were acquired on a Thermo ESCALAB Xi+ microprobe. UV-vis DRS was performed on an Agilent Cary5000 spectrometer with BaSO<sub>4</sub> as reference. PL spectra were obtained on an Edinburgh FLS1000 spectrometer with 325 nm excitation wavelength.

The photoelectrochemical properties were measured on a standard three-electrode system via the CHI760E instrument, where the Hg/HgO and Pt sheet were employed as the reference and counter electrodes, respectively. For the photocurrent and impedance measurements, the photocatalysts were deposited onto ITO (1 cm × 1 cm) as working electrode with a loading amount of 0.25 mg/cm<sup>2</sup>, and a mixture of Na<sub>2</sub>SO<sub>4</sub> (0.1 M), Na<sub>2</sub>SO<sub>3</sub> (0.1 M), and Na<sub>2</sub>S (0.01 M) was used as the electrolyte. Specifically, a constant potential of 0.8 V vs Hg/HgO was adopted to detect the photocurrent response of our prepared photocatalysts. The impedance analysis was carried out at the potential of 0.8 V vs Hg/HgO with amplitude of 10 mV and frequency range of 0.1 Hz to 100 kHz. For the HER test, the cocatalysts were deposited onto carbon paper (1 cm × 1 cm) as working electrode with a loading amount of 0.5 mg/cm<sup>2</sup>, and 1 M KOH solution was used as the electrolyte.

### **1.5. Photocatalytic HER measurements**

The photocatalytic HER activities of our prepared photocatalysts were evaluated in a sealed reactor with top-illuminated mode under 300 W Xe-lamp light source. Specifically, 15 mg photocatalyst was ultrasonically dispersed in 45 mL solution

containing 10 vol% TEOA as sacrificial agent. Next, the reaction system was purged with Ar for 15 min to remove air and then tightly sealed for photocatalytic reaction. During light irradiation, 0.2 mL of gas was sampled for analysis every hour through gas chromatograph (FULI GC7980 with TCD detector). The apparent quantum efficiency (AQE) was tested in the same way, but a 420 nm bandpass filter was used to acquire the 420 nm monochromatic light with power intensity of 14.5 mW/cm<sup>2</sup>. The AQE data was calculated as follows:

$$\text{AQE} = \frac{2 \times \text{Number of produced H}_2}{\text{Number of incident photons}}$$

## 2. Computational method

The density functional theory (DFT) calculations were performed by the Vienna ab-initio simulation package (VASP),<sup>1,2</sup> where the exchange-correlation functional was treated by the Perdew-Burke-Ernzerhof (PBE) parametrization of the generalized gradient approximation (GGA).<sup>3-5</sup> For structure relaxation, the 5×1×1 k-point grid was used for Brillouin zone sampling, and a kinetic energy cutoff of 500 eV was employed. Meanwhile, the lattice constants and atom coordinates were both optimized until the force was less than 0.01 eV/Å. The DFT-D3 method was used to describe the van der Waals (vdW) interaction.<sup>6</sup> For the HER simulation, the supercell slab (4×1) of (100) edge containing 4 layers was constructed with a 15 Å vacuum layer.

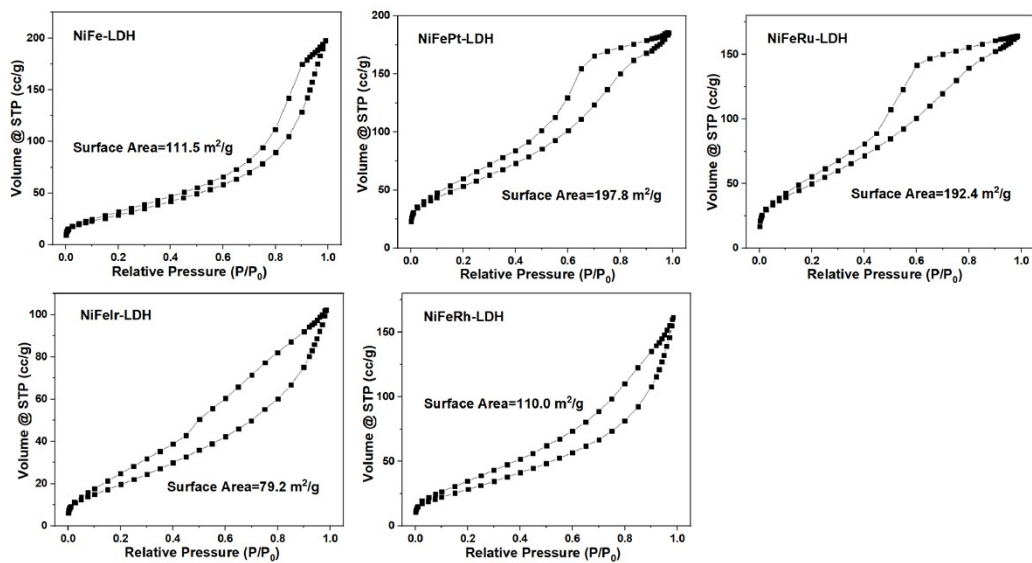

**Fig. S1**  $N_2$  adsorption-desorption isotherms and the corresponding surface area of NiFe-LDH and NiFeM-LDH.

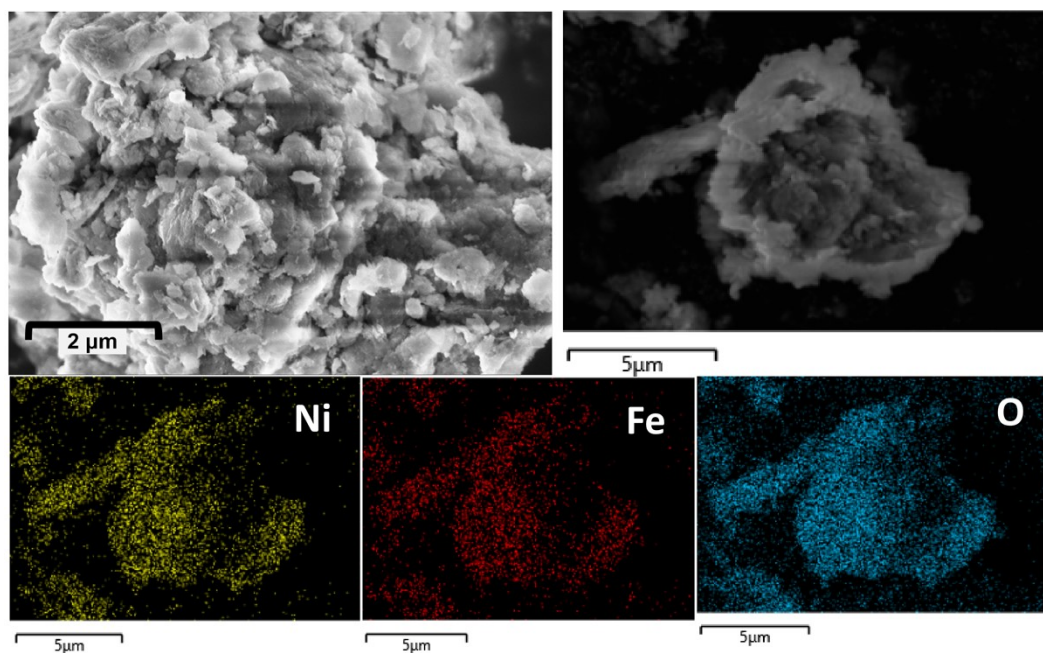

**Fig. S2** SEM images and EDS mappings of pristine NiFe-LDH.

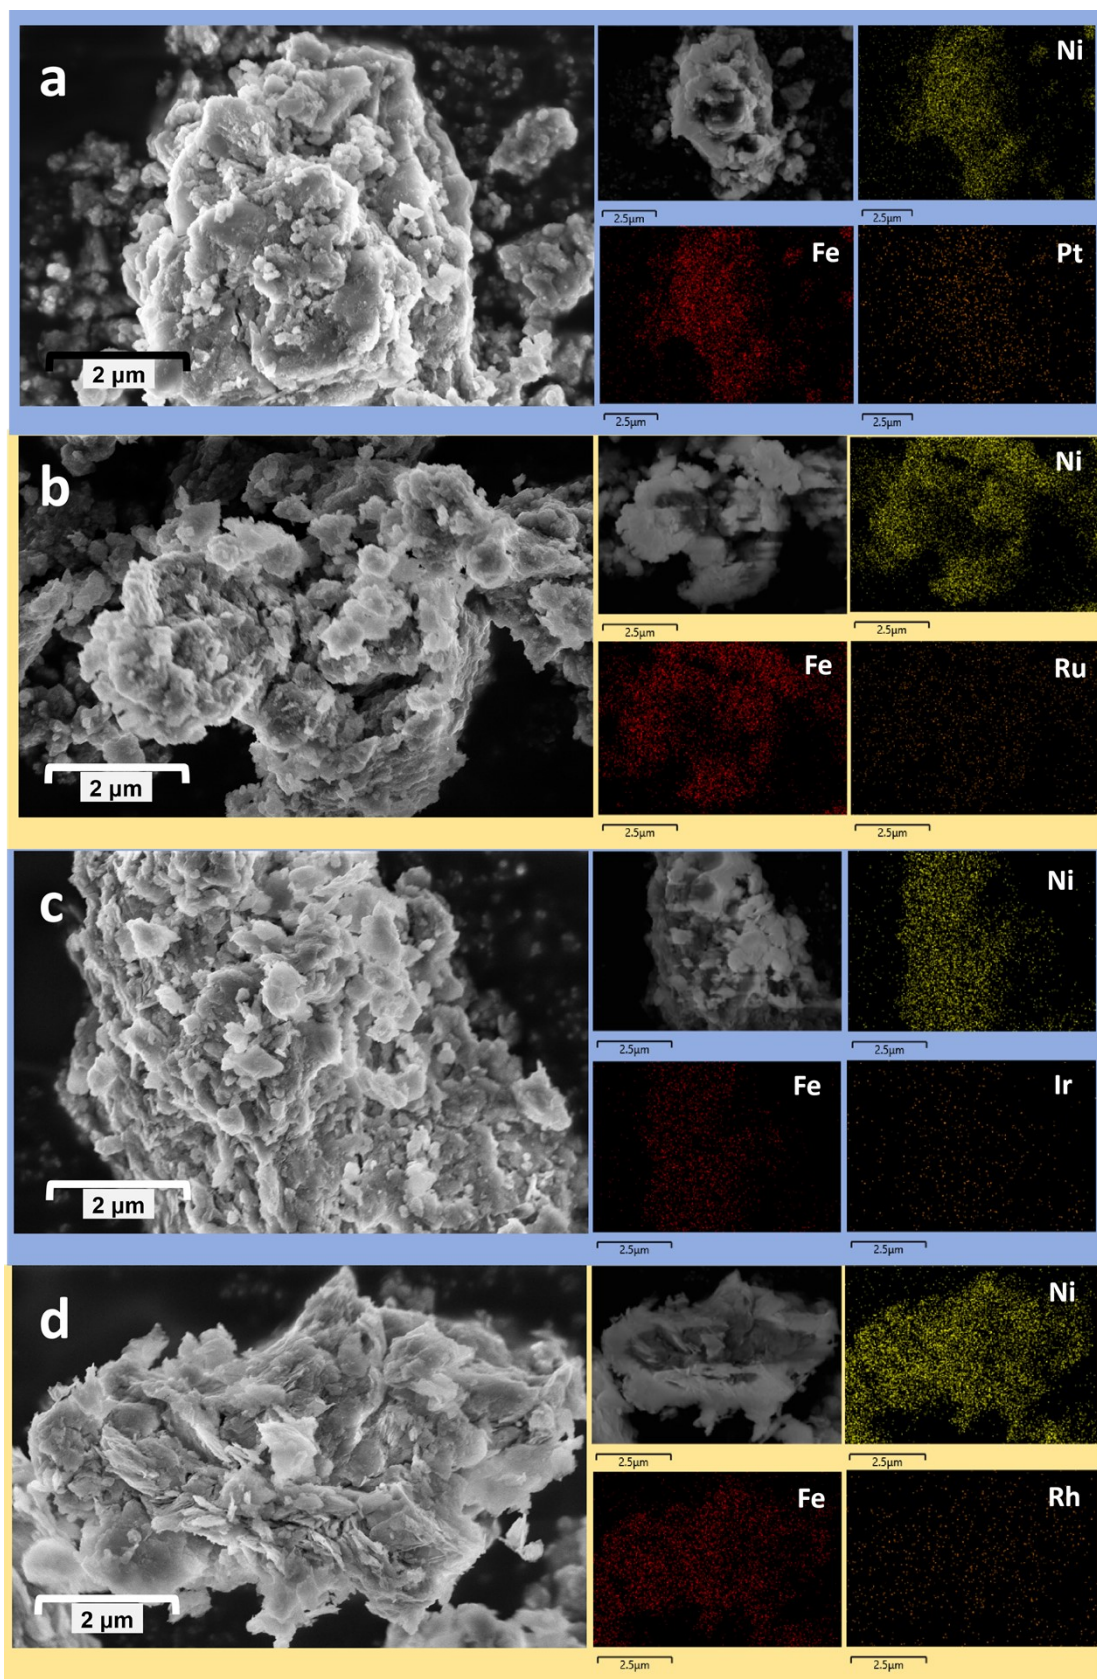

**Fig. S3** SEM images and EDS mappings of NiFePt-LDH (a), NiFeRu-LDH (b), NiFeIr-LDH (c), and NiFeRh-LDH (d).

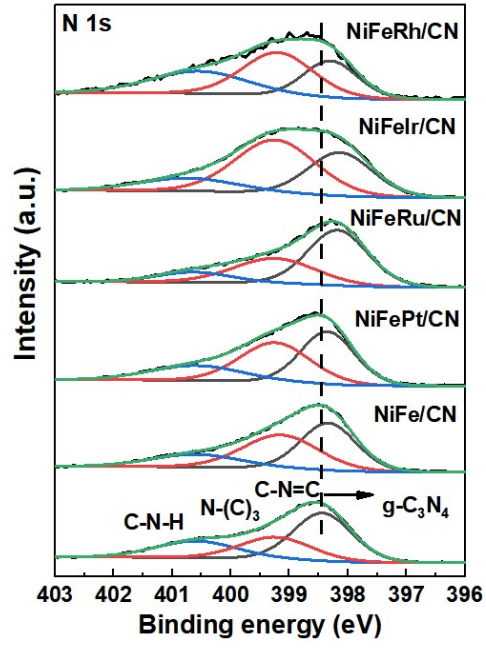

Fig. S4 XPS spectra of N 1s for g-C<sub>3</sub>N<sub>4</sub> and NiFeM/CN.



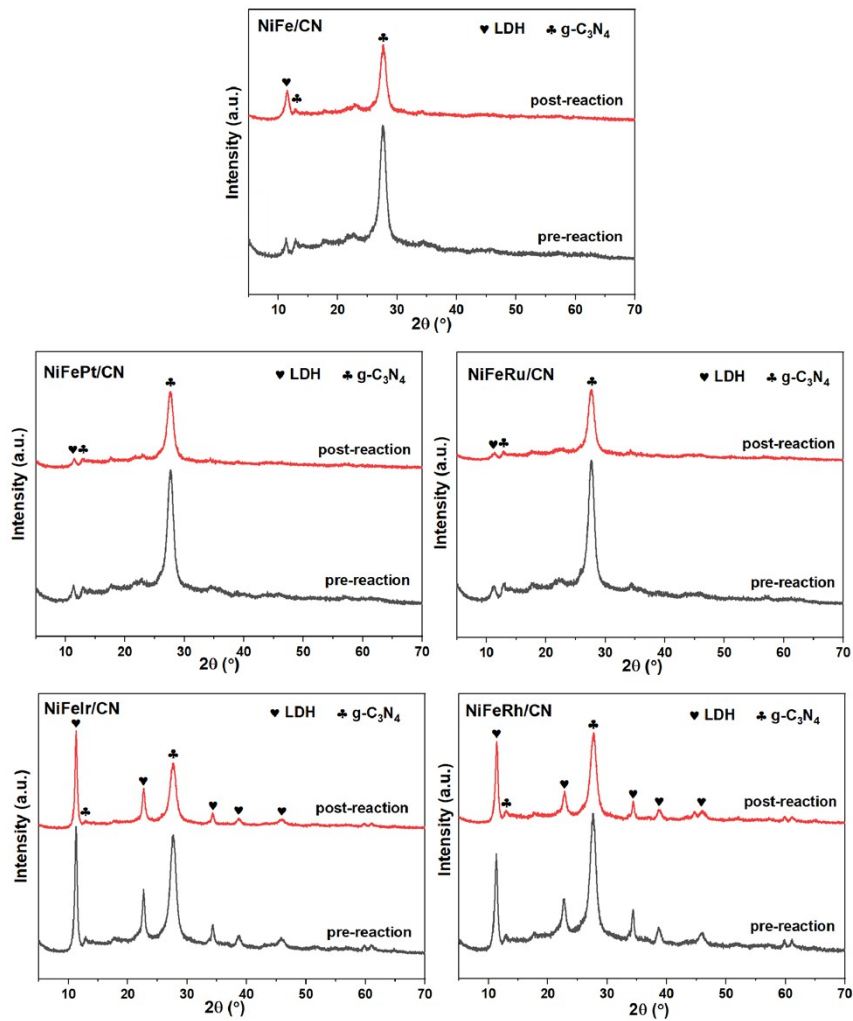

**Fig. S5** XRD patterns of NiFe/CN and NiFeM/CN before and after photocatalytic reaction.

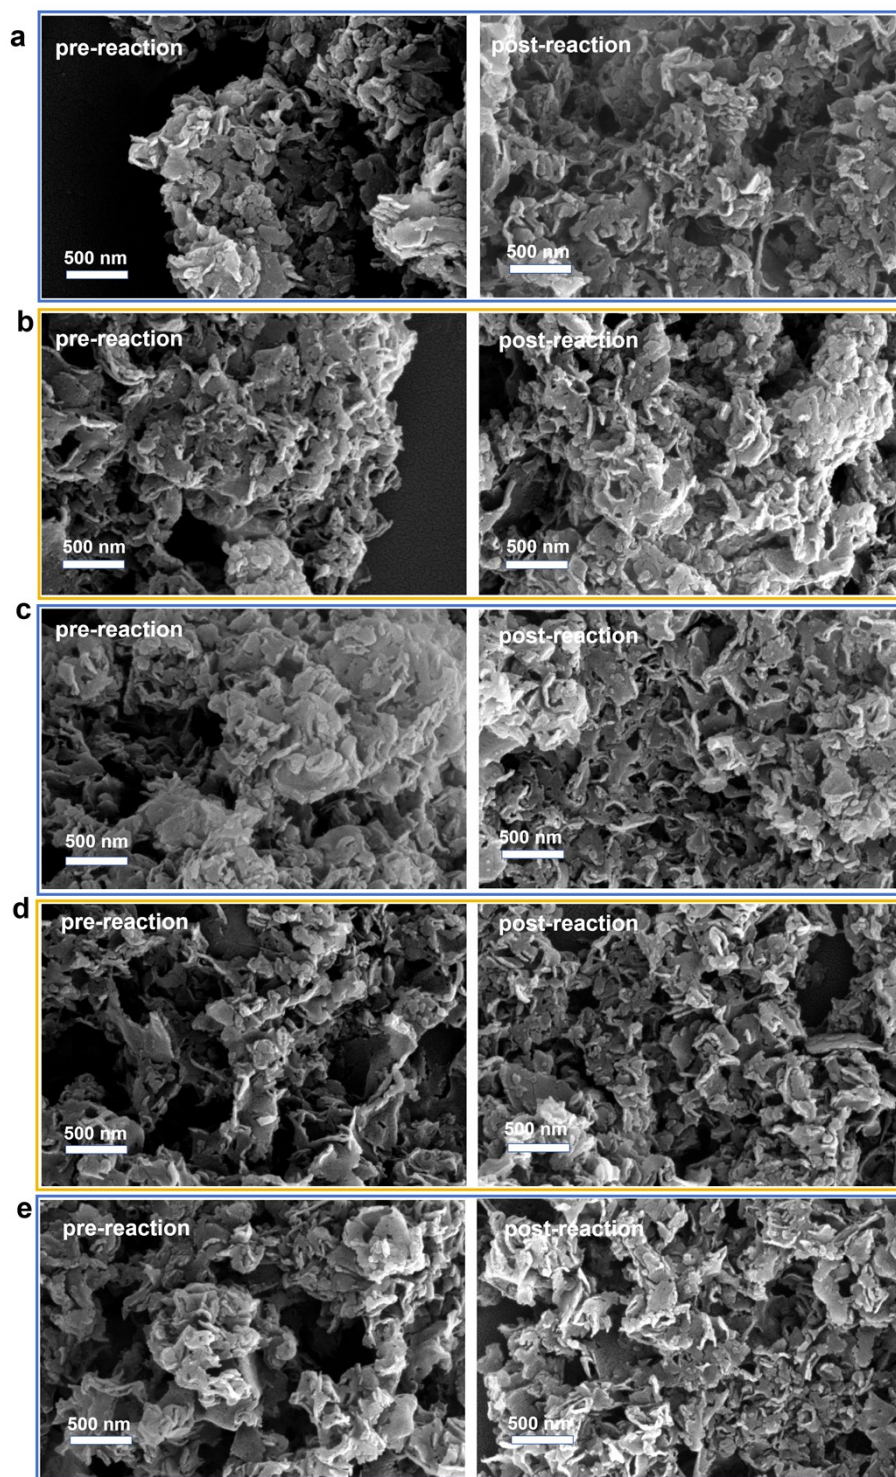

**Fig. S6** SEM images of NiFe/CN (a), NiFePt/CN (b), NiFeRu/CN (c), NiFeIr/CN (d) and NiFeRh/CN (e) before and after photocatalytic reaction.

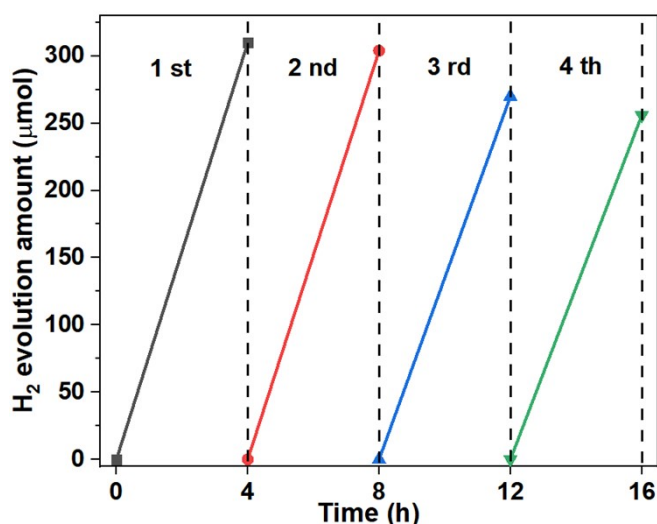

**Fig. S7** The stability test of NiFeRu/CN for photocatalytic H<sub>2</sub> evolution (four cycles).

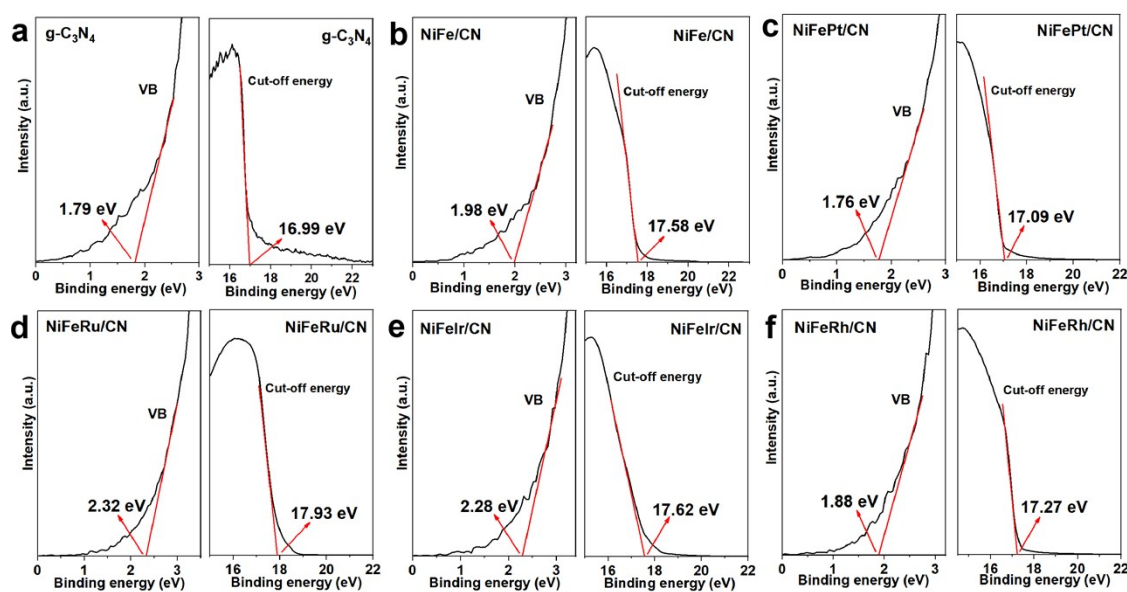

**Fig. S8** UPS spectra of g-C<sub>3</sub>N<sub>4</sub>, NiFe/CN and NiFeM/CN. Note: For semiconductors, the ionization energy (IE) is the energy difference between vacuum level ( $E_{vac}$ ) and valence band ( $E_{VB}$ , or HOMO level). Based on the UPS data, the IE can be calculated by the following formula:  $IE = h\nu - (E_{cut-off} - E_{VB})$ , where  $h\nu$  is about 21.22 eV. Then the  $E_{VB}$  vs. NHE is calculated as follows:  $E_{VB} \text{ (vs. NHE)} = -4.5 \text{ eV} - E_{VB} \text{ (vs. vacuum level)}$ , where the  $E_{VB}$  (vs. vacuum level) is equivalent to  $-IE$ .

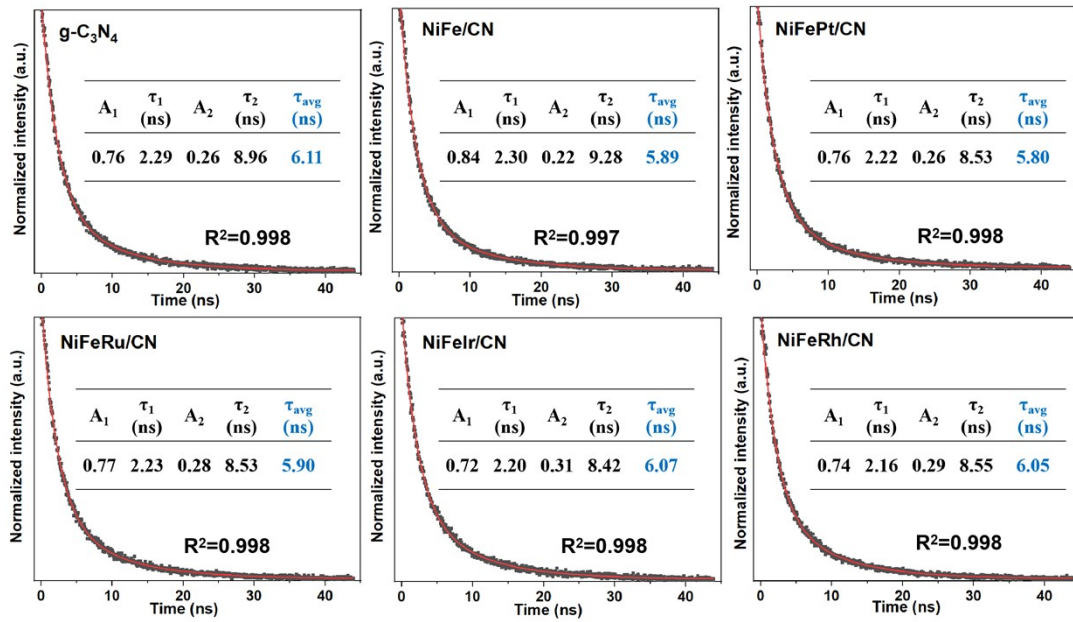

**Fig. S9** Time-resolved transient PL decay curves of  $g-C_3N_4$ , NiFe/CN and NiFeM/CN, where the spectra were fitted by a two-exponential function:  $I(t) = A_1 \exp(-t/\tau_1) + A_2 \exp(-t/\tau_2)$ ,  $\tau_{avg} = (A_1 \tau_1^2 + A_2 \tau_2^2) / (A_1 \tau_1 + A_2 \tau_2)$ .

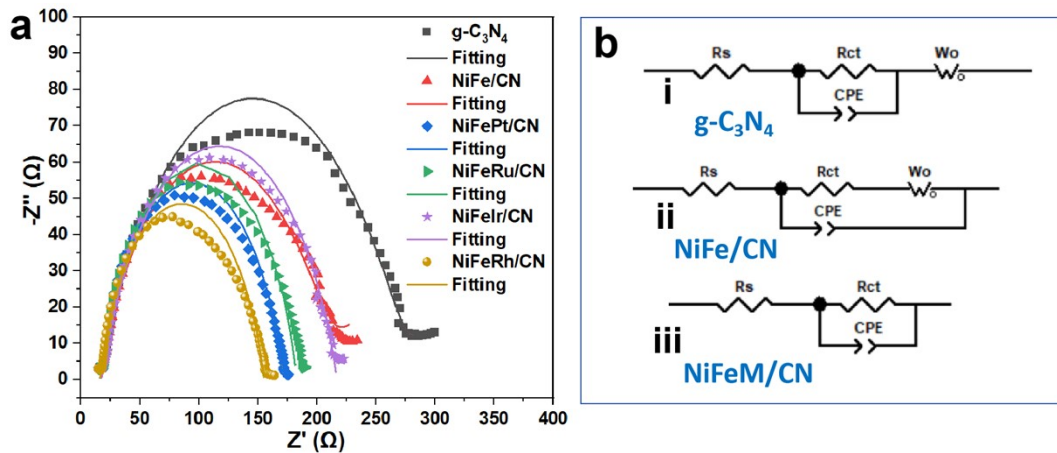

**Fig. S10** The measured (symbols) and fitted (solid lines) Nyquist impedance results of pristine  $g-C_3N_4$ , NiFe/CN, and NiFeM/CN (a); the corresponding equivalent circuits for fitting (b), i, ii, and iii is for  $g-C_3N_4$ , NiFe/CN, and NiFeM/CN, respectively.

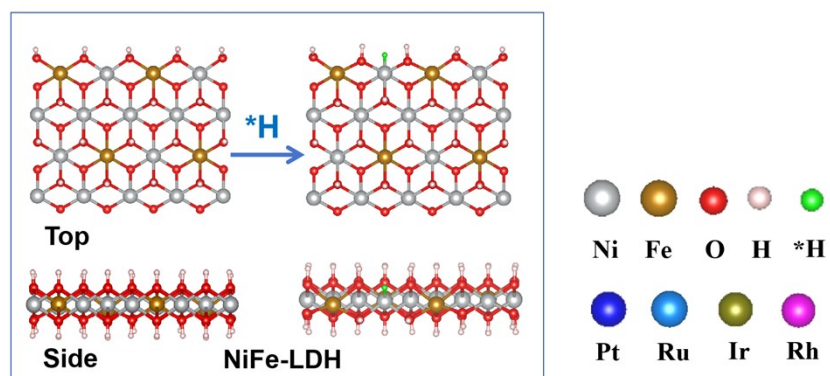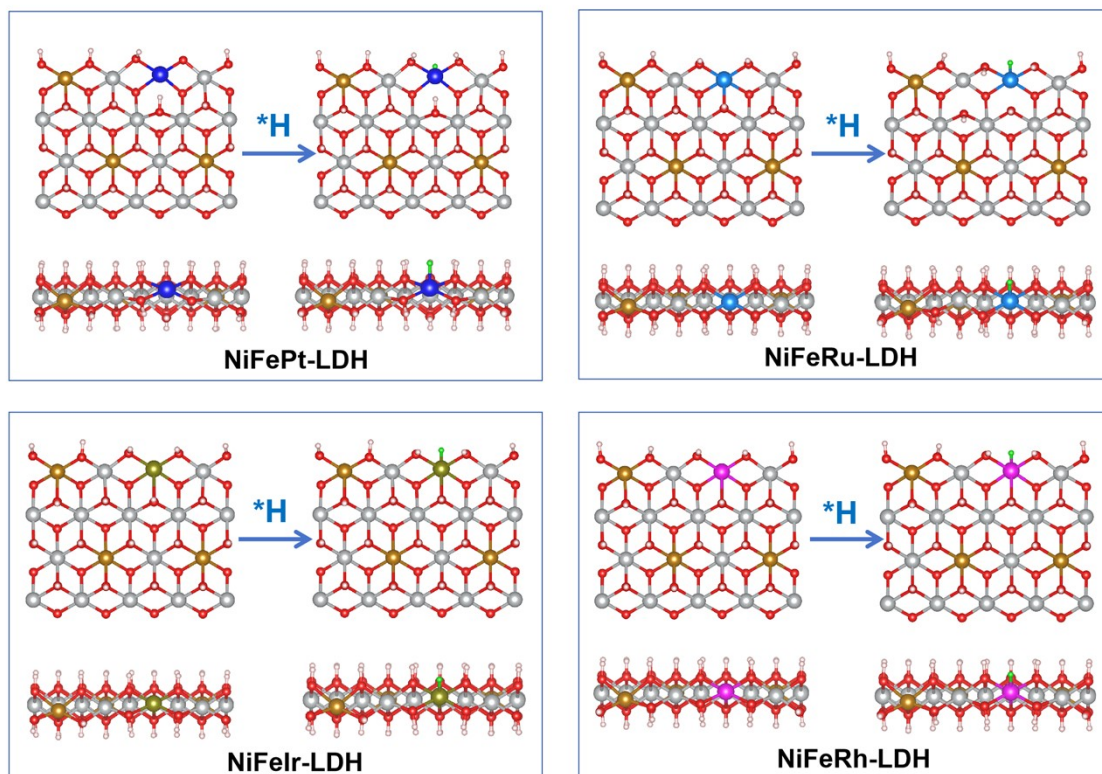

**Fig. S11** The geometric configurations of NiFe-LDH and NiFeM-LDH, and the corresponding transition states of H adsorption on Ni site (NiFe-LDH) and noble metal sites (NiFeM-LDH).

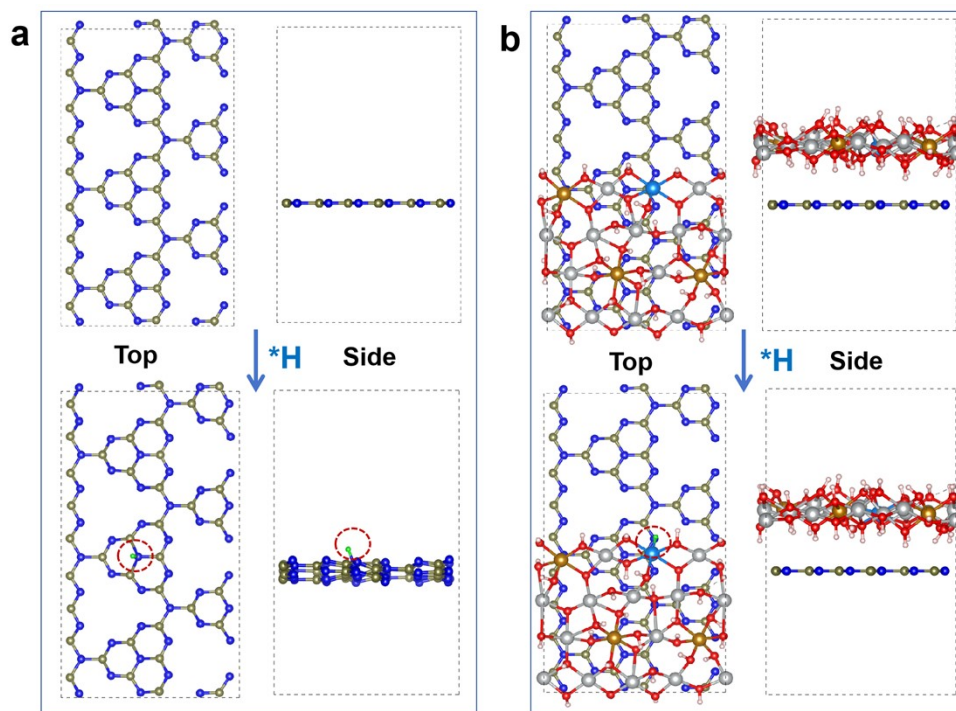

**Fig. S12** The geometric configurations and the transition states of H adsorption of  $\text{g-C}_3\text{N}_4$  (a) and  $\text{NiFeRu/CN}$  (b).

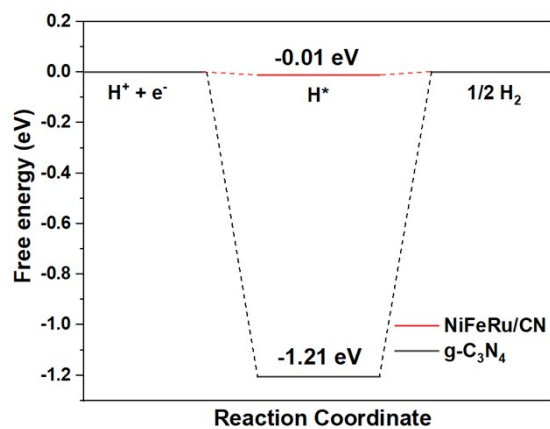

**Fig. S13** The calculated free-energy ( $\Delta G_{\text{H}^*}$ ) of  $\text{g-C}_3\text{N}_4$  and  $\text{NiFeRu/CN}$ .

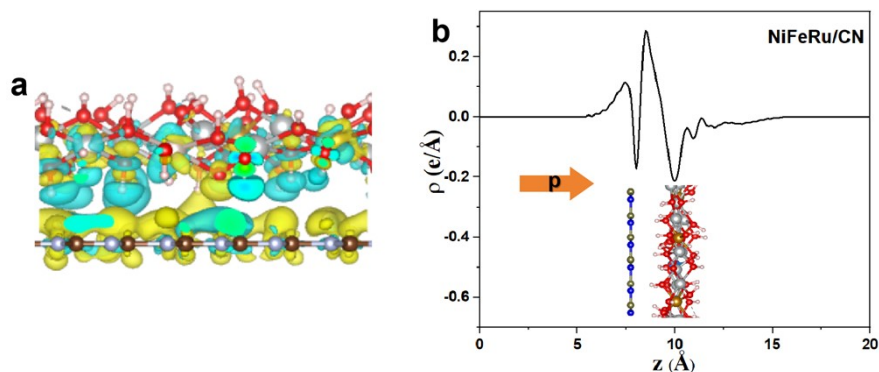

**Fig. S14** The charge density difference of NiFeRu/CN, in which blue and yellow regions indicate electron depletion and accumulation, respectively (a); Plane-average charge density difference (b).

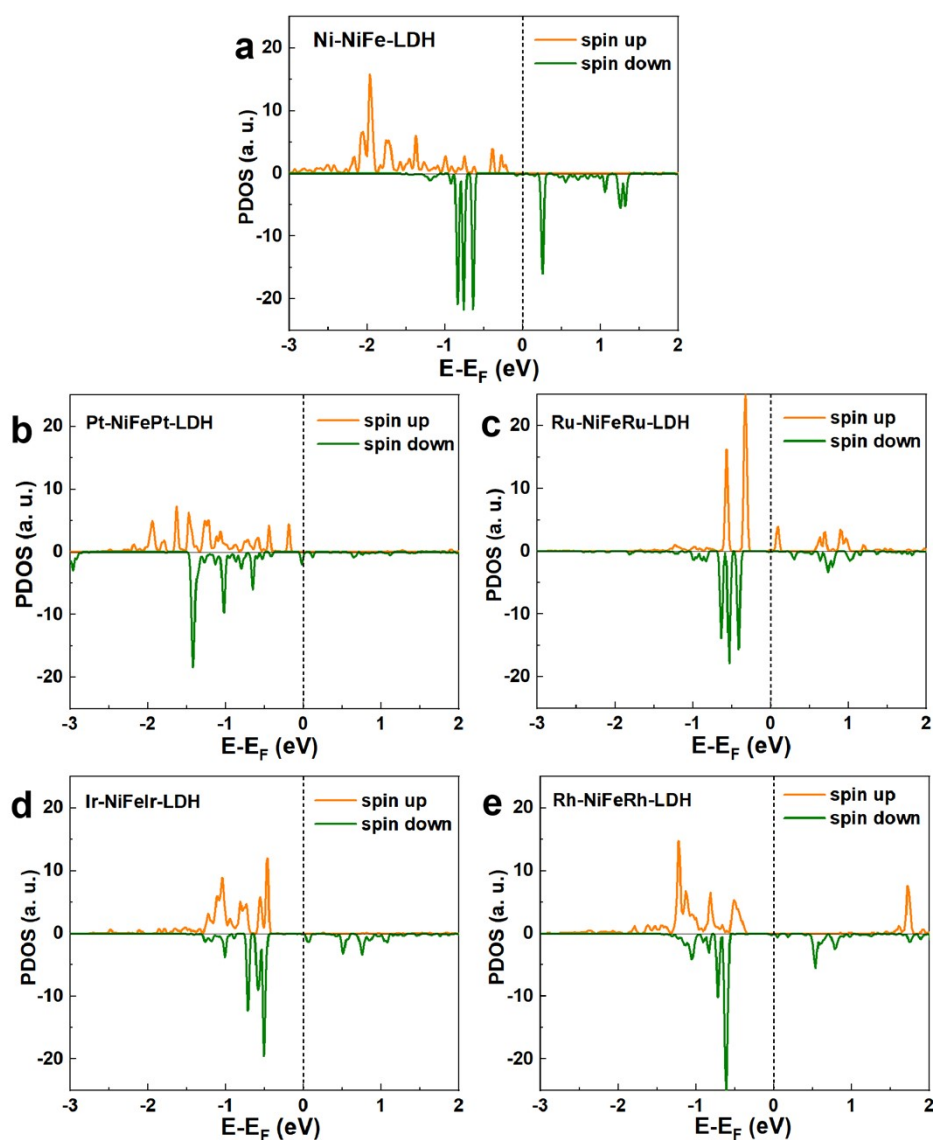

**Fig. S15** The partial density of states (PDOS) for Ni in NiFe-LDH (a), Pt in NiFePt-LDH (b), Ru in NiFeRu-LDH (c), Ir in NiFeIr-LDH (d), and Rh in NiFeRh-LDH (e), the  $E_F$  corresponds to Fermi level.

**Table S1.** Surface element content of cocatalysts obtained from EDS analysis

| Sample     | Element content (wt%) |       |       |       |           |
|------------|-----------------------|-------|-------|-------|-----------|
|            | C                     | O     | Ni    | Fe    | M         |
| NiFe-LDH   | 57.23                 | 21.41 | 10.74 | 10.62 | --        |
| NiFePt-LDH | 59.13                 | 18.86 | 8.82  | 12.64 | 0.56 (Pt) |
| NiFeRu-LDH | 34.19                 | 25.94 | 20.79 | 18.12 | 0.97 (Ru) |
| NiFeIr-LDH | 46.12                 | 24.84 | 16.97 | 11.69 | 0.38 (Ir) |
| NiFeRh-LDH | 47.83                 | 24.22 | 15.54 | 12.16 | 0.25 (Rh) |

**Table S2.** The fitting parameters for equivalent circuit

| Sample                          | $R_s$ ( $\Omega$ ) | Error of $R_s$ (%) | $R_{ct}$ ( $\Omega$ ) | Error of $R_{ct}$ (%) |
|---------------------------------|--------------------|--------------------|-----------------------|-----------------------|
| g-C <sub>3</sub> N <sub>4</sub> | 14.7               | 1.16               | 251.1                 | 0.88                  |
| NiFe/CN                         | 16.4               | 1.17               | 186.2                 | 6.80                  |
| NiFePt/CN                       | 16.9               | 1.06               | 155.0                 | 0.91                  |
| NiFeRu/CN                       | 17.4               | 1.55               | 165.7                 | 1.29                  |
| NiFeIr/CN                       | 17.7               | 1.05               | 199.5                 | 0.90                  |
| NiFeRh/CN                       | 16.0               | 1.07               | 139.3                 | 0.91                  |

**Table S3.** Band structures of g-C<sub>3</sub>N<sub>4</sub>, NiFe/CN and NiFeM/CN

| Samples                         | Band gap | Conduction band (LOMO) | Valence band (HOMO) |
|---------------------------------|----------|------------------------|---------------------|
| g-C <sub>3</sub> N <sub>4</sub> | 2.76 eV  | -1.24 eV               | 1.52 eV             |
| NiFe/CN                         | 2.61 eV  | -1.49 eV               | 1.12 eV             |
| NiFePt/CN                       | 2.66 eV  | -1.27 eV               | 1.39 eV             |
| NiFeRu/CN                       | 2.71 eV  | -1.60 eV               | 1.11 eV             |
| NiFeIr/CN                       | 2.71 eV  | -1.33 eV               | 1.38 eV             |
| NiFeRh/CN                       | 2.71 eV  | -1.38 eV               | 1.33 eV             |

Note: the band gaps ( $E_g$ ) are acquired from UV-vis DRS spectra through the formula:  $E_g$  (eV)=1240/ $\lambda$ , where  $\lambda$  is related to the absorption edges. And the  $E_{VB}$  (vs. NHE) values are acquired from UPS results,  $E_{CB}$  (vs. NHE)= $E_{VB}$  (vs. NHE)- $E_g$ .



**Table S4.** The calculated  $\Delta G_{H^*}$  on different metal sites

| Sample     | Ni-H <sup>a</sup> /eV | M-H <sup>c</sup> /eV |
|------------|-----------------------|----------------------|
| NiFe-LDH   | <b>0.58</b>           | 0.70 <sup>b</sup>    |
| NiFePt-LDH | 0.42                  | <b>0.26</b>          |
| NiFeRu-LDH | 0.57                  | <b>0.19</b>          |
| NiFeIr-LDH | 1.54                  | <b>-1.07</b>         |
| NiFeRh-LDH | 2.43                  | <b>-0.62</b>         |

<sup>a</sup> H adsorption on Ni site. <sup>b</sup> H adsorption on Fe site. <sup>c</sup> H adsorption on doped noble metal sites.

**Table S5.** The comparison of photocatalytic HER activity of recently reported g-C<sub>3</sub>N<sub>4</sub> with cocatalyst loading

| Photocatalyst                                         | Cocatalyst             | Light source  | Reaction conditions            | H <sub>2</sub> evolution rate (μmol/h) | AQE             | Ref.      |
|-------------------------------------------------------|------------------------|---------------|--------------------------------|----------------------------------------|-----------------|-----------|
| NiFeRu/CN                                             | NiFeRu-LDH             | 300 W Xe lamp | 15 mg catalyst, TEOA solution  | 77.4                                   | 0.53% at 420 nm | This work |
| NiFePt/CN                                             | NiFePt-LDH,            | 300 W Xe lamp | 15 mg catalyst, TEOA solution  | 43.5                                   | -               | This work |
| Pt/C <sub>3</sub> N <sub>4</sub>                      | Pt                     | 300 W Xe lamp | 100 mg catalyst, TEOA solution | 10.7                                   | 0.1% at 420 nm  | 7         |
| Cu-Ni(OH) <sub>2</sub> /C <sub>3</sub> N <sub>4</sub> | Cu-Ni(OH) <sub>2</sub> | 300 W Xe lamp | 20 mg catalyst, TEOA solution  | 40.7                                   | N/A             | 8         |
| PtNi/C <sub>3</sub> N <sub>4</sub>                    | PtNi                   | 300 W Xe lamp | 25 mg catalyst, TEOA solution  | 238.2                                  | 10.6% at 370 nm | 9         |
| NiCoP/C <sub>3</sub> N <sub>4</sub>                   | NiCoP                  | 300 W Xe lamp | 60 mg catalyst, TEOA solution  | 477.1                                  | N/A             | 10        |
| B-MoS <sub>2</sub> /C <sub>3</sub> N <sub>4</sub>     | B-MoS <sub>2</sub>     | 300 W Xe lamp | 25 mg catalyst, TEOA solution  | 40.3                                   | 5.54% at 370 nm | 11        |
| MoC-Mo <sub>2</sub> C/C <sub>3</sub> N <sub>4</sub>   | MoC-Mo <sub>2</sub> C  | 300 W Xe lamp | 20 mg catalyst, TEOA solution  | 81.6                                   | 1.3% at 420 nm  | 12        |
| MoO <sub>2</sub> -Pt/C <sub>3</sub> N <sub>4</sub>    | MoO <sub>2</sub> -Pt   | 300 W Xe lamp | 50 mg catalyst, TEOA solution  | 190.2                                  | N/A             | 13        |
| CoP/CoO/C <sub>3</sub> N <sub>4</sub>                 | CoP/CoO                | 300 W Xe lamp | 50 mg catalyst, TEOA solution  | 43                                     | 1.3% at 420 nm  | 14        |
| Ru-MoS <sub>2</sub> /C <sub>3</sub> N <sub>4</sub>    | Ru-MoS <sub>2</sub>    | 300 W Xe lamp | 10 mg catalyst, TEOA solution  | 111.2                                  | N/A             | 15        |

## Reference

- 1 G. Kresse and J. Hafner, *Phys. Rev. B Condens.*, 1993, **47**, 558-561.
- 2 G. Kresse and J. Furthmüller, *Comput. Mater. Sci.*, 1996, **6**, 15-50.
- 3 P. E. Blochl, *Phys. Rev. B Condens.*, 1994, **50**, 17953-17979.
- 4 G. Kresse and D. Joubert, *Phys. Rev. B Condens.*, 1999, **59**, 1758-1775.
- 5 J. P. Perdew, K. Burke and M. Ernzerhof, *Phys. Rev. Lett.*, 1996, **77**, 3865-3868.
- 6 S. Grimme, J. Antony, S. Ehrlich and H. Krieg, *J. Chem. Phys.*, 2010, **132**, 154104.
- 7 X. Wang, K. Maeda, A. Thomas, K. Takanabe, G. Xin, J.M. Carlsson, K. Domen and M. Antonietti, *Nat. Mater.*, 2009, **8**, 76-80.
- 8 D. Zhan, J. Tian, Q. Fu, P. Liu, Y. Zhao, W. Liu, D. Li, Y. Huang and C. Han, *Appl. Surf. Sci.*, 2023, **641**, 158463.
- 9 R. Li, Y. Wang, C. Zuo, J. Wang, X. Sheng, Y. Huang, Y. Zhang and Y. Zhou, *Int. J. Hydrogen Energy*, 2023, **48**, 28277-28288.
- 10 Y. Chen, J. Ma, J. Fu, L. Sun, J. Cheng and J.-F. Li, *Int. J. Hydrogen Energy*, 2024, **51**, 1145-1152.
- 11 P. Qiu, Y. An, X. Wang, S. An, X. Zhang, J. Tian and W. Zhu, *Chin. Chem. Lett.*, 2023, **34**, 108246.
- 12 X.-Q. Tan, P. Zhang, B. Chen, A. R. Mohamed and W.-J. Ong, *J. Colloid Interface Sci.*, 2024, **662**, 870-882.
- 13 F. Su, Z. Wang, M. Tian, C. Yang, H. Xie, C. Ding, X. Jin, J. Chen and L. Ye, *Chem. Asian J.*, 2023, **18**, e202201139.
- 14 Q. Wang, L. Kong, J. Xu, B. Zhou, X. Liu, Z. Lin, S. Shi, X. Zhang and L. Li, *ACS Sustainable Chem. Eng.*, 2024, **12**, 11717-11727.
- 15 X. Han, Q. Liu, A. Qian, L. Ye, X. Pu, J. Liu, X. Jia, R. Wang, F. Ju, H. Sun, J. Zhao and H. Ling, *ACS Appl. Mater. Interfaces*, 2023, **15**, 22, 26670-26681.
